# Supplementary material
Source: PubMed Central journal article supplement (PMC4844716)
Supplement: JCM.03195-15_zjm999094941so1.pdf [file JCM.03195-15_zjm999094941so1.pdf]

**Supplemental material for “Genomic epidemiology and molecular resistance mechanisms of azithromycin resistant *Neisseria gonorrhoeae* in Canada from 1997 to 2014”**

Walter Demczuk, Irene Martin, Shelley Peterson, Amrita Bharat, Gary Van Domselaar, Morag Graham, Brigitte Lefebvre, Vanessa Allen, Linda Hoang, Greg Tyrrell, Greg Horsman, John Wylie, David Haldane, Chris Archibald, Tom Wong, Magnus Unemo, Michael R. Mulvey

**Supplemental Table S1: Geographical distribution of *Neisseria gonorrhoeae* isolates selected for analysis**

| Isolate Collection Location | Azithromycin Susceptible | Azithromycin Resistant <sup>a</sup> | No. isolates included in study |
|-----------------------------|--------------------------|-------------------------------------|--------------------------------|
| Alberta                     | 0                        | 27                                  | 27                             |
| British Columbia            | 2                        | 34                                  | 36                             |
| Manitoba                    | 0                        | 3                                   | 3                              |
| Nova Scotia                 | 0                        | 3                                   | 3                              |
| Ontario                     | 7                        | 50                                  | 57                             |
| Quebec                      | 13                       | 88                                  | 101                            |
| Saskatchewan                | 1                        | 8                                   | 9                              |
| Canada                      | 23                       | 213                                 | 236                            |
| International <sup>b</sup>  | 9                        | 1                                   | 10                             |
| Total                       | 32                       | 214                                 | 249                            |

<sup>a</sup>Represents all viable azithromycin resistant (MIC  $\geq$  2  $\mu$ g/mL) isolates available in collection.

<sup>b</sup>Includes ten international reference strains: ATCC49226, WHO-F, WHO-G, WHO-K, WHO-L, WHO-M, WHO-N, WHO-O, WHO-P, and France F89.

**Supplemental Table S2: Temporal distribution of Canadian *Neisseria gonorrhoeae* isolates selected for analysis**

| Year                   | No. isolates available   |                        |       | No. of Canadian isolates included this study |                                     |                    |
|------------------------|--------------------------|------------------------|-------|----------------------------------------------|-------------------------------------|--------------------|
|                        | Azithromycin Susceptible | Azithromycin Resistant | Total | Azithromycin Susceptible                     | Azithromycin Resistant <sup>a</sup> | Total <sup>b</sup> |
| 1988–1996 <sup>c</sup> | 72 <sup>d</sup>          | 0                      | 72    | 2                                            | 0                                   | 2                  |
| 1997                   | 642                      | 20                     | 662   | 0                                            | 7                                   | 7                  |
| 1998                   | 1130                     | 25                     | 1155  | 1                                            | 10                                  | 11                 |
| 1999                   | 1051                     | 11                     | 1062  | 1                                            | 7                                   | 8                  |
| 2000                   | 1185                     | 7                      | 1192  | 0                                            | 7                                   | 7                  |
| 2001                   | 1210                     | 4                      | 1214  | 0                                            | 2                                   | 2                  |
| 2002                   | 1134                     | 12                     | 1146  | 0                                            | 3                                   | 3                  |
| 2003                   | 778                      | 1                      | 779   | 0                                            | 1                                   | 1                  |
| 2004                   | 844                      | 6                      | 850   | 1                                            | 3                                   | 4                  |
| 2005                   | 890                      | 8                      | 898   | 1                                            | 7                                   | 8                  |
| 2006                   | 1520                     | 8                      | 1528  | 1                                            | 6                                   | 7                  |
| 2007                   | 1425                     | 7                      | 1432  | 1                                            | 7                                   | 8                  |
| 2008                   | 925                      | 5                      | 930   | 1                                            | 5                                   | 6                  |
| 2009                   | 903                      | 11                     | 914   | 1                                            | 7                                   | 8                  |
| 2010                   | 1183                     | 36                     | 1219  | 8                                            | 36                                  | 44                 |
| 2011                   | 1158                     | 13                     | 1171  | 2                                            | 12                                  | 14                 |
| 2012                   | 1008                     | 26                     | 1034  | 1                                            | 24                                  | 25                 |
| 2013                   | 1148                     | 36                     | 1184  | 1                                            | 34                                  | 35                 |
| Jan-Jul 2014           | 908                      | 51                     | 959   | 1                                            | 35                                  | 36                 |
| Total                  | 19114                    | 287                    | 19401 | 23                                           | 213                                 | 236                |

<sup>a</sup>Represents all viable azithromycin resistant (MIC  $\geq$  2  $\mu$ g/mL) isolates available in collection.

<sup>b</sup>Ten international reference strains include WHO-F, WHO-G, WHO-K, WHO-L, WHO-M, WHO-M, WHO-O, WHO-P, ATCC49226, and France F89.

<sup>c</sup>The National Microbiology Laboratory began collecting *N. gonorrhoeae* isolates from 1988 and the first Canadian AZI-R isolate was detected in 1997.

<sup>d</sup>Represents the number of isolates tested for azithromycin susceptibility during this time period.

**Supplemental Table S3: Number of single nucleotide polymorphisms (SNPs) in the core genome within, and between the major phylogenomic clades of *Neisseria gonorrhoeae* isolates**

| Clade | No. Isolates | Average SNPs within Clade | Maximum SNPs within Clade | Average SNPs from next clade <sup>a</sup> | Minimum SNPs from next clade <sup>a</sup> | Maximum SNPs from next clade <sup>a</sup> |
|-------|--------------|---------------------------|---------------------------|-------------------------------------------|-------------------------------------------|-------------------------------------------|
| A     | 21           | 3.0                       | 14                        | 7.8                                       | 5                                         | 15                                        |
| B     | 4            | 0.4                       | 1                         | 215.3                                     | 106                                       | 241                                       |
| C     | 10           | 97.7                      | 292                       | 363.5                                     | 269                                       | 414                                       |
| D     | 5            | 3.2                       | 10                        | 356.6                                     | 354                                       | 364                                       |
| E     | 5            | 1.0                       | 2                         | 474.3                                     | 464                                       | 476                                       |
| F     | 16           | 6.3                       | 49                        | 325.2                                     | 221                                       | 494                                       |
| G     | 11           | 111.9                     | 339                       | 584.8                                     | 519                                       | 811                                       |
| H     | 45           | 64.4                      | 246                       | 357.4                                     | 271                                       | 513                                       |
| I     | 10           | 54.3                      | 255                       | 313.9                                     | 246                                       | 392                                       |
| J     | 8            | 88.0                      | 189                       | 985.1                                     | 951                                       | 1014                                      |
| K     | 35           | 24.9                      | 65                        | 749.1                                     | 735                                       | 779                                       |
| L     | 5            | 36.0                      | 103                       | 1314.8                                    | 1307                                      | 1340                                      |
| M     | 14           | 1.4                       | 6                         | 1450.6 <sup>b</sup>                       | 1448 <sup>b</sup>                         | 1459 <sup>b</sup>                         |

<sup>a</sup>Number of SNPs compared to the following closest ancestral clade in the phylogeny.

<sup>b</sup>Number of SNPs compared to clade A in the phylogeny.

**Supplemental Table S4: Metadata associated with isolates tested**

| Isolate | BioSampleID  | Year | Province         | Sex       | Age   | Isolation Site | Organism            | Clade | NG-MAST | MLST  | AZI | CFX   | CFM   | 23S rRNA A2059T | 23S rRNA C2611T | mtrRp   | A39T | G45D | erm | macAB |
|---------|--------------|------|------------------|-----------|-------|----------------|---------------------|-------|---------|-------|-----|-------|-------|-----------------|-----------------|---------|------|------|-----|-------|
| 15363   | SAMN04191699 | 1994 | Quebec           | Female    | 17    | Not Given      | CMRNG               |       | 380     | 11421 | 0.5 | 0.125 | 0.063 | 0               | 0               | -35ADel | WT   | G45D |     | Neg   |
| 19095   | SAMN04191700 | 1998 | British Columbia | Male      |       | Penis/Urethra  | CMRNG/AziR          | K     | 5       | 1579  | 2   | 0.004 | 0.004 | 0               | 0               | -35ADel | WT   | WT   |     | Neg   |
| 19156   | SAMN04191701 | 1998 | British Columbia | Male      | 33.38 | Penis/Urethra  | Probable CMRNG      | K     | 21      | 1579  | 2   | 0.016 | 0.008 | 0               | 0               | -35ADel | WT   | WT   |     | Neg   |
| 19173   | SAMN04191702 | 1998 | Ontario          | Male      |       | Not Given      | CMRNG               | K     | 21      | 1579  | 1   | 0.25  | 0.125 | 0               | 0               | -35ADel | WT   | WT   |     | Neg   |
| 19255   | SAMN04191703 | 1998 | Ontario          | Male      |       | Not Given      | Probable CMRNG      | K     | 10502   | 1579  | 2   | 0.016 | 0.032 | 0               | 0               | -35ADel | WT   | WT   |     | Neg   |
| 19328   | SAMN04191704 | 1998 | Alberta          | Not Given |       | Not Given      | CMRNG/AziR/CipR     |       | 10575   | 1901  | 2   | 0.063 | 0.016 | 0               | 0               | -35ADel | WT   | WT   |     | Neg   |
| 19366   | SAMN04191705 | 1997 | Quebec           | Male      | 41    | Penis/Urethra  | CMRNG/AziR          | K     | 10576   | 1579  | 2   | 0.063 | 0.032 | 0               | 0               | -35ADel | WT   | WT   |     | Neg   |
| 19398   | SAMN04191706 | 1997 | Quebec           | Male      | 31    | Penis/Urethra  | CMRNG/AziR          | K     | 21      | 1579  | 2   | 0.032 | 0.016 | 0               | 0               | -35ADel | WT   | WT   |     | Neg   |
| 19418   | SAMN04191707 | 1997 | Quebec           | Male      | 39    | Rectum         | CMRNG/AziR          | K     | 21      | 1579  | 2   | 0.032 | 0.032 | 0               | 0               | -35ADel | WT   | WT   |     | Neg   |
| 19432   | SAMN04191708 | 1997 | Quebec           | Male      | 31    | Penis/Urethra  | CMRNG/AziR          | K     | 21      | 1579  | 2   | 0.032 | 0.016 | 0               | 0               | -35ADel | WT   | WT   |     | Neg   |
| 19433   | SAMN04191709 | 1997 | Quebec           | Male      | 39    | Penis/Urethra  | CMRNG/AziR          | K     | 21      | 1579  | 2   | 0.032 | 0.032 | 0               | 0               | -35ADel | WT   | WT   |     | Pos   |
| 19439   | SAMN04191710 | 1997 | Quebec           | Male      | 40    | Penis/Urethra  | CMRNG/AziR          | K     | 21      | 1579  | 2   | 0.063 | 0.032 | 0               | 0               | -35ADel | WT   | WT   |     | Neg   |
| 19446   | SAMN04191711 | 1997 | Quebec           | Male      | 45    | Throat         | CMRNG/AziR          | K     | 21      | 1579  | 2   | 0.032 | 0.016 | 0               | 0               | -35ADel | WT   | WT   |     | Neg   |
| 19486   | SAMN04191712 | 1998 | British Columbia | Male      | 22.93 | Penis/Urethra  | CMRNG/AziR          | K     | 5       | 1579  | 2   | 0.032 | 0.032 | 0               | 0               | -35ADel | WT   | WT   |     | Neg   |
| 19491   | SAMN04191713 | 1998 | British Columbia | Not Given |       | Penis/Urethra  | CMRNG/AziR/CipR     |       | 10577   | 7360  | 2   | 0.032 | 0.032 | 0               | 0               | -35ADel | WT   | WT   |     | Neg   |
| 19492   | SAMN04191714 | 1998 | British Columbia | Male      |       | Penis/Urethra  | CMRNG/AziR          | K     | 5       | 1579  | 2   | 0.063 | 0.032 | 0               | 0               | -35ADel | WT   | WT   |     | Neg   |
| 19501   | SAMN04191715 | 1998 | British Columbia | Male      | 28.27 | Penis/Urethra  | Probable CMRNG      | K     | 5       | 1579  | 2   | 0.008 | 0.008 | 0               | 0               | -35ADel | WT   | WT   |     | Neg   |
| 20359   | SAMN04191716 | 1999 | British Columbia | Male      | 22.14 | Penis/Urethra  | Probable CMRNG      | K     | 5       | 1579  | 2   | 0.016 | 0.008 | 0               | 0               | -35ADel | WT   | WT   |     | Neg   |
| 20360   | SAMN04191717 | 1999 | British Columbia | Male      | 24.47 | Penis/Urethra  | AziR/EryR/TetR      | K     | 5       | 1579  | 2   | 0.008 | 0.008 | 0               | 0               | -35ADel | WT   | WT   |     | Neg   |
| 20869   | SAMN04191718 | 1998 | Nova Scotia      | Male      |       | Not Given      | Probable CMRNG      | G     | 64      | 1580  | 4   | 0.008 | 0.016 | 0               | AC=3            | WT      | WT   | G45D |     | Neg   |
| 20870   | SAMN04191719 | 1998 | Nova Scotia      | Male      |       | Not Given      | AziR/EryR/TetR      | G     | 64      | 1580  | 4   | 0.008 | 0.008 | 0               | AC=3            | WT      | WT   | G45D |     | Neg   |
| 21280   | SAMN04191720 | 1999 | British Columbia | Male      |       | Penis/Urethra  | CMRNG/AziR          | K     | 5       | 1579  | 2   | 0.016 | 0.008 | 0               | 0               | -35ADel | WT   | WT   |     | Neg   |
| 21283   | SAMN04191721 | 1999 | British Columbia | Male      |       | Penis/Urethra  | Probable CMRNG      | K     | 5       | 1579  | 2   | 0.008 | 0.016 | 0               | 0               | -35ADel | WT   | WT   |     | Neg   |
| 21295   | SAMN04191722 | 1999 | British Columbia | Male      | 38.15 | Penis/Urethra  | Probable CMRNG/CipR |       | 10575   | 1901  | 2   | 0.008 | 0.008 | 0               | 0               | -35ADel | WT   | WT   |     | Neg   |
| 21297   | SAMN04191723 | 1999 | British Columbia | Male      | 42.16 | Penis/Urethra  | Probable CMRNG      | K     | 5       | 1579  | 2   | 0.008 | 0.008 | 0               | 0               | -35ADel | WT   | WT   |     | Neg   |
| 21414   | SAMN04191724 | 2000 | British Columbia | Female    | 16.06 | Cervix         | Probable CMRNG      | K     | 10503   | 1579  | 2   | 0.016 | 0.016 | 0               | 0               | -35ADel | WT   | WT   |     | Neg   |
| 21505   | SAMN04191725 | 2000 | Ontario          | Male      |       | Penis/Urethra  | Probable CMRNG      | K     | 21      | 1579  | 2   | 0.016 | 0.032 | 0               | 0               | -35ADel | WT   | WT   |     | Neg   |
| 21631   | SAMN04191726 | 1999 | Quebec           | Male      | 41    | Penis/Urethra  | AziR/EryR/TetR      |       | 10578   | 10899 | 1   | 0.016 | 0.008 | 0               | 0               | WT      | WT   | G45D |     | Neg   |
| 21648   | SAMN04191727 | 1999 | Quebec           | Male      | 38    | Penis/Urethra  | CMRNG/AziR          | K     | 251     | 1579  | 2   | 0.032 | 0.016 | 0               | 0               | -35ADel | WT   | WT   |     | Neg   |
| 21959   | SAMN04191728 | 2000 | Ontario          | Male      |       | Rectum         | CMRNG/AziR          | K     | 21      | 1579  | 2   | 0.016 | 0.016 | 0               | 0               | -35ADel | WT   | WT   |     | Neg   |
| 21960   | SAMN04191729 | 2000 | Ontario          | Male      |       | Penis/Urethra  | CMRNG/AziR          | K     | 21      | 1579  | 2   | 0.016 | 0.016 | 0               | 0               | -35ADel | WT   | WT   |     | Neg   |
| 22223   | SAMN04191730 | 2000 | Ontario          | Male      |       | Penis/Urethra  | CMRNG/AziR          | K     | 21      | 1579  | 2   | 0.016 | 0.032 | 0               | 0               | -35ADel | WT   | WT   |     | Neg   |
| 22247   | SAMN04191731 | 2000 | Ontario          | Male      | 41.88 | Rectum         | CMRNG/AziR          | K     | 5       | 1579  | 2   | 0.016 | 0.016 | 0               | 0               | -35ADel | WT   | WT   |     | Pos   |
| 22484   | SAMN04191732 | 2000 | Ontario          | Male      |       | Penis/Urethra  | CMRNG/AziR          | K     | 21      | 1579  | 2   | 0.016 | 0.032 | 0               | 0               | -35ADel | WT   | WT   |     | Neg   |
| 23545   | SAMN04191733 | 2001 | British Columbia | Female    | 35.92 | Cervix         | Probable CMRNG/AziR | K     | 5       | 1579  | 2   | 0.016 | 0.016 | 0               | 0               | -35ADel | WT   | WT   |     | Neg   |
| 23814   | SAMN04191734 | 2001 | Quebec           | Male      | 18    | Penis/Urethra  | CMRNG/AziR          | K     | 21      | 1579  | 2   | 0.063 | 0.032 | 0               | 0               | -35ADel | WT   | WT   |     | Neg   |
| 24069   | SAMN04191735 | 2002 | British Columbia | Male      | 45.29 | Penis/Urethra  | Probable CMRNG/AziR |       | 154     | 1587  | 2   | 0.032 | 0.016 | 0               | AC=2            | WT      | WT   | G45D |     | Neg   |
| 24201   | SAMN04191736 | 2002 | British Columbia | Female    | 17.98 | Rectum         | CMRNG/AziR          | K     | 5       | 1579  | 2   | 0.063 | 0.016 | 0               | 0               | -35ADel | WT   | WT   |     | Neg   |
| 25151   | SAMN04191737 | 2002 | Quebec           | Male      | 42    | Penis/Urethra  | CMRNG/AziR/CxDS     | K     | 5       | 1579  | 2   | 0.125 | 0.063 | 0               | 0               | -35ADel | WT   | WT   |     | Neg   |
| 25452   | SAMN04191738 | 2003 | British Columbia | Male      | 25.9  | Penis/Urethra  | CMRNG/AziR          | K     | 5       | 1579  | 8   | 0.016 | 0.016 | 0               | AC=3            | -35ADel | WT   | WT   |     | Neg   |
| 26446   | SAMN04191739 | 2004 | British Columbia | Male      | 22.25 | Penis/Urethra  | PenR/TetR/CipR/CeRS |       | 4437    | 7363  | 0.5 | 0.063 | 0.5   | 0               | 0               | -35ADel | WT   | G45D |     | Neg   |

|       |              |      |                  |        |       |               |                          |   |      |       |                |       |       |      |      |             |      |      |      |     |
|-------|--------------|------|------------------|--------|-------|---------------|--------------------------|---|------|-------|----------------|-------|-------|------|------|-------------|------|------|------|-----|
| 26502 | SAMN04191740 | 2004 | Ontario          | Male   | 37    | Penis/Urethra | AziR/EryR                |   | 1116 | 1587  | 4              | 0.008 | 0.016 | 0    | AC=4 | WT          | WT   | G45D | Neg  |     |
| 26629 | SAMN04191741 | 2005 | Manitoba         | Male   | 24    | Penis/Urethra | AziR/EryR                | G | 64   | 1580  | 4              | 0.004 | 0.008 | 0    | AC=4 | WT          | WT   | G45D | Neg  |     |
| 26748 | SAMN04191742 | 2004 | Quebec           | Male   | 20    | Penis/Urethra | CMRNG/AziR               | K | 5445 | 1579  | 4              | 0.016 | 0.016 | 0    | AC=4 | -35ADel     | WT   | WT   | Neg  |     |
| 26891 | SAMN04191743 | 2005 | Ontario          | Male   | 39    | Not Given     | AziR/EryR                | G | 64   | 1580  | 4              | 0.008 | 0.032 | 0    | AC=4 | WT          | WT   | G45D | Neg  |     |
| 26967 | SAMN04191744 | 2004 | Ontario          | Male   | 37    | Penis/Urethra | PPNG/TRNG/AziR/CipR/EryR |   | 1948 | 7823  | $\geq 5$<br>12 | 0.016 | 0.032 | AC=4 | 0    | -35ADel     | WT   | WT   | Neg  |     |
| 27040 | SAMN04191745 | 2005 | British Columbia | Male   | 24.17 | Throat        | AziR/CipR/EryR/TetR      |   | 3132 | 1901  | 2              | 0.008 | 0.008 | 0    | 0    | -35ADel     | WT   | WT   | Neg  |     |
| 27046 | SAMN04191746 | 2005 | Manitoba         | Male   | 29    | Rectum        | AziR/EryR/TetR           | G | 64   | 1580  | 4              | 0.016 | 0.032 | 0    | AC=4 | WT          | WT   | G45D | Neg  |     |
| 27455 | SAMN04191747 | 2005 | Manitoba         | Female | 23    | Cervix        | AziR/EryR                | G | 64   | 1580  | 2              | 0.008 | 0.016 | 0    | AC=4 | WT          | WT   | G45D | Neg  |     |
| 27588 | SAMN04191748 | 2005 | Quebec           | Female | 22    | Throat        | CMRNG/CipR               | H | 1407 | 1901  | 0.5            | 0.032 | 0.125 | 0    | 0    | -35ADel     | WT   | WT   | Neg  |     |
| 27632 | SAMN04191749 | 2005 | Quebec           | Male   | 18    | Rectum        | CMRNG/AziR/CipR          | J | 3155 | 1901  | 8              | 0.032 | 0.016 | 0    | AC=4 | -35ADel     | WT   | WT   | Neg  |     |
| 27633 | SAMN04191750 | 2005 | Quebec           | Male   | 32    | Penis/Urethra | CMRNG/AziR/CipR          | J | 3155 | 1901  | 16             | 0.032 | 0.016 | 0    | AC=4 | -35ADel     | WT   | WT   | Neg  |     |
| 27924 | SAMN04191751 | 2006 | British Columbia | Male   | 35.26 | Penis/Urethra | AziR/EryR                | G | 64   | 1580  | 4              | 0.008 | 0.008 | 0    | AC=4 | WT          | WT   | G45D | Neg  |     |
| 28076 | SAMN04191752 | 2006 | Quebec           | Male   | 32    | Penis/Urethra | CMRNG/CipR               |   | 225  | 1901  | 1              | 0.032 | 0.032 | 0    | 0    | -35ADel     | WT   | WT   | Neg  |     |
| 28194 | SAMN04191753 | 2006 | Quebec           | Male   | 25    | Penis/Urethra | CMRNG/AziR/CipR          |   | 225  | 1901  | 8              | 0.032 | 0.016 | 0    | AC=4 | -35ADel     | WT   | WT   | Neg  |     |
| 28759 | SAMN04191754 | 2006 | Ontario          | Female |       | Not Given     | CMRNG/AziR               |   | 4813 | 6959  | 16             | 0.008 | 0.008 | 0    | 0    | WT          | A39T | WT   | ermC | Neg |
| 29151 | SAMN04191755 | 2006 | Quebec           | Female | 21    | Cervix        | CMRNG/AziR/CipR          | I | 3150 | 1901  | 4              | 0.032 | 0.032 | 0    | AC=4 | -35ADel     | WT   | WT   | Neg  |     |
| 29360 | SAMN04191756 | 2007 | British Columbia | Male   | 46.76 | Penis/Urethra | AziR/EryR/TetR           | G | 4815 | 1580  | 8              | 0.008 | 0.032 | 0    | AC=4 | WT          | WT   | G45D | Neg  |     |
| 29362 | SAMN04191757 | 2007 | British Columbia | Female | 21.93 | Throat        | AziR/EryR/TetR           | G | 4815 | 1580  | 8              | 0.004 | 0.032 | 0    | AC=4 | WT          | WT   | G45D | Neg  |     |
| 30014 | SAMN04191758 | 2007 | Ontario          | Male   |       | Not Given     | AziR/CipR/EryR           | J | 3116 | 8153  | 2              | 0.032 | 0.016 | 0    | 0    | -35ADel     | WT   | WT   | Neg  |     |
| 30198 | SAMN04191759 | 2007 | Quebec           | Male   | 31    | Penis/Urethra | CMRNG/AziR/CipR          |   | 892  | 1901  | 2              | 0.032 | 0.016 | 0    | AC=2 | -35ADel     | WT   | WT   | Neg  |     |
| 30220 | SAMN04191760 | 2007 | Quebec           | Male   | 19    | Rectum        | CMRNG/AziR/CipR          |   | 225  | 1901  | 2              | 0.032 | 0.032 | 0    | 0    | -35ADel     | WT   | WT   | ermB | Neg |
| 30248 | SAMN04191761 | 2007 | Quebec           | Male   | 54    | Penis/Urethra | PPNG/TRNG/AziR/CipR/EryR |   | 4814 | 7822  | 2              | 0.063 | 0.032 | 0    | 0    | -35ADel     | WT   | G45D | Neg  |     |
| 30374 | SAMN04191762 | 2007 | Quebec           | Male   | 44    | Rectum        | CMRNG/CipR               | H | 3158 | 1901  | 0.5            | 0.063 | 0.125 | 0    | 0    | -35ADel     | WT   | WT   | Neg  |     |
| 30382 | SAMN04191763 | 2007 | Quebec           | Male   | 27    | Penis/Urethra | Probable CMRNG/AziR/CipR |   | 225  | 1901  | 2              | 0.063 | 0.016 | 0    | AC=2 | -35ADel     | WT   | WT   | Neg  |     |
| 30616 | SAMN04191764 | 2006 | Alberta          | Male   | 22    | Penis/Urethra | AziR/EryR                | G | 4815 | 1580  | 8              | 0.008 | 0.032 | 0    | AC=4 | WT          | WT   | G45D | Neg  |     |
| 30617 | SAMN04191765 | 2006 | Alberta          | Female | 17    | Cervix        | AziR/EryR                | G | 4815 | 1580  | 8              | 0.008 | 0.032 | 0    | AC=4 | WT          | WT   | G45D | Neg  |     |
| 30978 | SAMN04191766 | 2008 | Ontario          | Female | 36    | Not Given     | CMRNG/AziR/CipR          |   | 4827 | 11425 | 16             | 0.063 | 0.063 | 0    | AC=4 | -35ADel     | WT   | WT   | Neg  |     |
| 31138 | SAMN04191767 | 2008 | Ontario          | Male   | 48    | Not Given     | CMRNG/AziR/CipR          |   | 4816 | 1901  | 4              | 0.032 | 0.063 | 0    | 0    | -35ADel     | WT   | WT   | ermB | Neg |
| 31182 | SAMN04191768 | 2008 | Ontario          | Female | 43    | Not Given     | Probable CMRNG/AziR/CipR |   | 421  | 6714  | 4              | 0.032 | 0.032 | 0    | 0    | -35ADel     | WT   | G45D | Pos  |     |
| 31256 | SAMN04191769 | 2008 | Ontario          | Male   | 56    | Not Given     | CMRNG/AziR/CipR          |   | 4836 | 1901  | 32             | 0.063 | 0.032 | 0    | AC=4 | -35ADel     | WT   | WT   | Neg  |     |
| 31284 | SAMN04191770 | 2008 | Ontario          | Male   | 22    | Not Given     | CMRNG/CipR               | J | 3108 | 8153  | 0.5            | 0.063 | 0.032 | 0    | 0    | -35ADel     | WT   | WT   | Neg  |     |
| 31408 | SAMN04191771 | 2008 | Quebec           | Female | 18    | Cervix        | CMRNG/AziR/CipR          |   | 3132 | 1901  | 8              | 0.032 | 0.032 | 0    | AC=4 | -35ADel     | WT   | WT   | Neg  |     |
| 31623 | SAMN04191772 | 2009 | Quebec           | Female | 30    | Cervix        | PPNG/TRNG/AziR/CipR/EryR |   | 1948 | 11426 | $\geq 5$<br>12 | 0.125 | 0.125 | AC=4 | 0    | -35ADel     | WT   | WT   | Neg  |     |
| 31636 | SAMN04191773 | 2009 | British Columbia | Male   | 24.72 | Rectum        | AziR/EryR/TetR           | C | 2992 | 9363  | 2              | 0.008 | 0.008 | 0    | 0    | menigitidis | WT   | WT   | Neg  |     |
| 31804 | SAMN04191774 | 2009 | British Columbia | Male   | 20.68 | Rectum        | CMRNG/AziR/CipR          | H | 1407 | 1901  | 16             | 0.063 | 0.125 | 0    | AC=4 | -35ADel     | WT   | WT   | Neg  |     |
| 31812 | SAMN04191775 | 2009 | British Columbia | Male   | 20.68 | Rectum        | CMRNG/AziR/CipR          | H | 1407 | 1901  | 16             | 0.063 | 0.125 | 0    | AC=4 | -35ADel     | WT   | WT   | Neg  |     |
| 31821 | SAMN04191776 | 2009 | British Columbia | Female |       | Throat        | CMRNG/AziR/CipR          | H | 1407 | 1901  | 16             | 0.063 | 0.125 | 0    | AC=4 | -35ADel     | WT   | WT   | Neg  |     |
| 31822 | SAMN04191777 | 2009 | British Columbia | Female |       | Rectum        | CMRNG/AziR/CipR          | H | 1407 | 1901  | 16             | 0.063 | 0.125 | 0    | AC=4 | -35ADel     | WT   | WT   | Neg  |     |
| 31834 | SAMN04191778 | 2009 | Quebec           | Male   | 48    | Penis/Urethra | Susceptible Strain       |   | 2992 | 9363  | 0.5            | 0.016 | 0.016 | 0    | 0    | WT          | A39T | WT   | Neg  |     |
| 32151 | SAMN04191779 | 2009 | Ontario          | Male   | 28    | Not Given     | CMRNG/AziR/CipR          |   | 225  | 1901  | 2              | 0.063 | 0.063 | 0    | AC=2 | -35ADel     | WT   | WT   | Neg  |     |
| 32402 | SAMN04191780 | 2010 | British Columbia | Male   | 19.63 | Penis/Urethra | Probable CMRNG/AziR/CipR | I | 285  | 1901  | 2              | 0.008 | 0.008 | 0    | 0    | -35ADel     | WT   | WT   | Neg  |     |
| 32648 | SAMN04191781 | 2010 | British Columbia | Male   | 51.68 | Penis/Urethra | CMRNG/AziR/CipR          |   | 4809 | 1901  | 8              | 0.063 | 0.016 | 0    | AC=4 | -35ADel     | WT   | WT   | Neg  |     |
| 32752 | SAMN04191782 | 2010 | British Columbia | Male   | 53.36 | Penis/Urethra | Susceptible Strain       |   | 2992 | 9363  | 0.5            | 0.016 | 0.016 | 0    | 0    | WT          | A39T | WT   | Neg  |     |

|       |              |      |                     |        |       |               |                             |   |      |       |          |       |       |      |      |         |      |    |     |
|-------|--------------|------|---------------------|--------|-------|---------------|-----------------------------|---|------|-------|----------|-------|-------|------|------|---------|------|----|-----|
| 32867 | SAMN04191783 | 2010 | Ontario             | Male   | 34    | Not Given     | CMRNG/AziR/CxDS/CipR        |   | 4980 | 1901  | ≥5<br>12 | 0.063 | 0.063 | AC=4 | 0    | -35ADel | WT   | WT | Neg |
| 32928 | SAMN04191784 | 2010 | Ontario             | Male   | 26    | Not Given     | CMRNG/AziR/CipR             | I | 3150 | 1579  | 2        | 0.063 | 0.032 | 0    | 0    | -35ADel | WT   | WT | Neg |
| 32956 | SAMN04191785 | 2010 | Ontario             | Male   | 24    | Not Given     | CMRNG/AziR/CipR             |   | 225  | 1901  | 16       | 0.063 | 0.032 | 0    | AC=4 | -35ADel | WT   | WT | Neg |
| 33121 | SAMN04191786 | 2010 | Alberta             | Female | 23    | Cervix        | AziR/EryR                   | M | 688  | 8122  | 4        | 0.008 | 0.008 | 0    | AC=4 | WT      | WT   | WT | Neg |
| 33128 | SAMN04191787 | 2010 | Alberta             | Female | 35    | Throat        | AziR/EryR                   | M | 688  | 8122  | 4        | 0.008 | 0.008 | 0    | AC=4 | WT      | WT   | WT | Neg |
| 33133 | SAMN04191788 | 2010 | Alberta             | Male   | 23    | Penis/Urethra | AziR/EryR                   | M | 688  | 8122  | 4        | 0.008 | 0.008 | 0    | AC=4 | WT      | WT   | WT | Neg |
| 33136 | SAMN04191789 | 2010 | Alberta             | Male   | 42    | Penis/Urethra | AziR/EryR                   | M | 688  | 8122  | 2        | 0.008 | 0.008 | 0    | AC=4 | WT      | WT   | WT | Neg |
| 33137 | SAMN04191790 | 2010 | Alberta             | Female | 36    | Cervix        | AziR/EryR                   | M | 688  | 8122  | 4        | 0.008 | 0.008 | 0    | AC=4 | WT      | WT   | WT | Neg |
| 33144 | SAMN04191791 | 2010 | Alberta             | Male   | 43    | Other         | AziR/EryR                   | M | 688  | 8122  | 4        | 0.008 | 0.016 | 0    | AC=4 | WT      | WT   | WT | Neg |
| 33375 | SAMN04191792 | 2010 | Ontario             | Female | 29    | Not Given     | CMRNG/CeDS/CxDS/CipR        | H | 1407 | 1901  | 0.5      | 0.125 | 0.25  | 0    | 0    | -35ADel | WT   | WT | Neg |
| 33383 | SAMN04191793 | 2010 | Ontario             | Male   | 41    | Not Given     | CMRNG/AziR/CipR             | I | 3150 | 1901  | 2        | 0.063 | 0.032 | 0    | 0    | -35ADel | WT   | WT | Neg |
| 33386 | SAMN04191794 | 2010 | Ontario             | Female | 35    | Not Given     | CMRNG/CipR                  | I | 3150 | 10886 | 1        | 0.063 | 0.016 | 0    | 0    | -35ADel | WT   | WT | Neg |
| 33387 | SAMN04191795 | 2010 | Ontario             | Male   | 38    | Not Given     | CMRNG/AziR/CxDS/CipR        | H | 1407 | 1901  | 2        | 0.125 | 0.125 | 0    | 0    | -35ADel | WT   | WT | Neg |
| 33404 | SAMN04191796 | 2010 | Ontario             | Female | 31    | Not Given     | CMRNG/AziR/CipR             | I | 3150 | 1901  | 2        | 0.063 | 0.032 | 0    | 0    | -35ADel | WT   | WT | Neg |
| 33457 | SAMN04191797 | 2010 | Ontario             | Male   | 24    | Not Given     | CMRNG/CeDS/CxDS/CipR        | H | 5372 | 1901  | 1        | 0.125 | 0.25  | 0    | 0    | -35ADel | WT   | WT | Neg |
| 33523 | SAMN04191798 | 2010 | Ontario             | Female | 31    | Not Given     | CMRNG/CipR                  | H | 1407 | 1901  | 1        | 0.063 | 0.125 | 0    | 0    | -35ADel | WT   | WT | Neg |
| 33546 | SAMN04191799 | 2010 | Ontario             | Male   | 24    | Not Given     | Probable<br>CMRNG/CipR      | H | 3378 | 1901  | 1        | 0.063 | 0.125 | 0    | 0    | -35ADel | WT   | WT | Neg |
| 33629 | SAMN04191800 | 2010 | Alberta             | Female | 21    | Cervix        | AziR/EryR                   | M | 688  | 8122  | 2        | 0.004 | 0.004 | 0    | AC=4 | WT      | WT   | WT | Neg |
| 33630 | SAMN04191801 | 2010 | Alberta             | Male   | 22    | Penis/Urethra | AziR/EryR/TetR              | M | 688  | 8122  | 4        | 0.004 | 0.008 | 0    | AC=4 | WT      | WT   | WT | Neg |
| 33632 | SAMN04191802 | 2010 | Alberta             | Female | 21    | Throat        | AziR/EryR                   | M | 688  | 8122  | 4        | 0.008 | 0.008 | 0    | AC=4 | WT      | WT   | WT | Neg |
| 33637 | SAMN04191803 | 2010 | Alberta             | Male   | 33    | Penis/Urethra | AziR/EryR/TetR              |   | 2992 | 9363  | 4        | 0.004 | 0.008 | 0    | AC=3 | WT      | A39T | WT | Neg |
| 33638 | SAMN04191804 | 2010 | Alberta             | Female | 53    | Cervix        | AziR/EryR                   | M | 688  | 8122  | 4        | 0.004 | 0.032 | 0    | AC=4 | WT      | WT   | WT | Neg |
| 33647 | SAMN04191805 | 2010 | Alberta             | Female | 21    | Cervix        | AziR/EryR                   | M | 688  | 8122  | 4        | 0.008 | 0.008 | 0    | AC=4 | WT      | WT   | WT | Neg |
| 33648 | SAMN04191806 | 2010 | Alberta             | Female | 19    | Rectum        | AziR/EryR                   | M | 688  | 8122  | 4        | 0.008 | 0.008 | 0    | AC=4 | WT      | WT   | WT | Neg |
| 33660 | SAMN04191807 | 2010 | Alberta             | Female | 17    | Cervix        | CMRNG/AziR/CipR             | I | 3150 | 1901  | 2        | 0.063 | 0.032 | 0    | 0    | -35ADel | WT   | WT | Neg |
| 33661 | SAMN04191808 | 2010 | Alberta             | Male   | 25    | Penis/Urethra | CMRNG/AziR/CipR             | I | 3150 | 1901  | 2        | 0.063 | 0.032 | 0    | 0    | -35ADel | WT   | WT | Neg |
| 33759 | SAMN04191809 | 2010 | Quebec              | Male   | 16    | Penis/Urethra | AziR/EryR                   | A | 2992 | 9363  | 8        | 0.004 | 0.016 | 0    | AC=4 | WT      | A39T | WT | Neg |
| 33815 | SAMN04191810 | 2010 | Quebec              | Male   | 21    | Penis/Urethra | AziR/EryR                   | A | 2992 | 9363  | 8        | 0.004 | 0.008 | 0    | AC=4 | WT      | A39T | WT | Neg |
| 33817 | SAMN04191811 | 2010 | Quebec              | Male   | 31    | Penis/Urethra | AziR/EryR                   | A | 2992 | 9363  | 8        | 0.004 | 0.016 | 0    | AC=4 | WT      | A39T | WT | Neg |
| 33825 | SAMN04191812 | 2010 | Quebec              | Male   | 37    | Throat        | AziR/EryR                   | A | 2992 | 9363  | 8        | 0.004 | 0.004 | 0    | AC=4 | WT      | A39T | WT | Neg |
| 33858 | SAMN04191813 | 2010 | Quebec              | Male   | 21    | Penis/Urethra | AziR/EryR                   | A | 6296 | 9363  | 8        | 0.004 | 0.008 | 0    | AC=4 | WT      | A39T | WT | Neg |
| 33890 | SAMN04191814 | 2010 | Quebec              | Male   | 46    | Penis/Urethra | AziR/EryR                   | A | 2992 | 9363  | 8        | 0.004 | 0.008 | 0    | AC=4 | WT      | A39T | WT | Neg |
| 33901 | SAMN04191815 | 2010 | Quebec              | Male   | 25    | Rectum        | CMRNG/CipR                  | H | 1407 | 1901  | 1        | 0.008 | 0.008 | 0    | 0    | -35ADel | WT   | WT | Neg |
| 33904 | SAMN04191816 | 2010 | Quebec              | Male   | 26    | Throat        | Probable<br>CMRNG/AziR/CipR | J | 757  | 1901  | 8        | 0.016 | 0.016 | 0    | AC=3 | -35ADel | WT   | WT | Neg |
| 33922 | SAMN04191817 | 2010 | Quebec              | Male   | 29    | Penis/Urethra | AziR/EryR                   | A | 2992 | 9363  | 8        | 0.004 | 0.004 | 0    | AC=4 | WT      | A39T | WT | Neg |
| 33925 | SAMN04191818 | 2010 | Quebec              | Male   | 55    | Penis/Urethra | AziR/EryR                   | A | 2992 | 9363  | 8        | 0.004 | 0.004 | 0    | AC=4 | WT      | A39T | WT | Neg |
| 33934 | SAMN04191819 | 2010 | Quebec              | Male   | 28    | Penis/Urethra | AziR/EryR                   | A | 2992 | 9363  | 8        | 0.004 | 0.004 | 0    | AC=4 | WT      | A39T | WT | Neg |
| 33935 | SAMN04191820 | 2010 | Quebec              | Male   | 18    | Throat        | AziR/EryR                   | A | 2992 | 9363  | 8        | 0.002 | 0.004 | 0    | AC=4 | WT      | A39T | WT | Neg |
| 33969 | SAMN04191821 | 2010 | Quebec              | Male   | 33    | Throat        | CMRNG/AziR/CipR             | H | 3149 | 1901  | 2        | 0.063 | 0.125 | 0    | 0    | -35ADel | WT   | WT | Neg |
| 33997 | SAMN04191822 | 2010 | Quebec              | Male   | 43    | Penis/Urethra | Probable<br>CMRNG/CipR      | J | 757  | 1901  | 0.5      | 0.016 | 0.032 | 0    | AC=1 | -35ADel | WT   | WT | Neg |
| 34099 | SAMN04191823 | 2011 | British<br>Columbia | Male   | 58.57 | Penis/Urethra | CMRNG/AziR/CipR             | H | 1407 | 1901  | 8        | 0.063 | 0.125 | 0    | AC=3 | -35ADel | WT   | WT | Pos |
| 34106 | SAMN04191824 | 2011 | Saskatchewan        | Female | 19.65 | Cervix        | AziR/EryR/PenR              | M | 688  | 8122  | 4        | 0.008 | 0.008 | 0    | AC=4 | WT      | WT   | WT | Pos |
| 34108 | SAMN04191825 | 2011 | Saskatchewan        | Female | 28.01 | Other         | AziR/EryR                   | M | 688  | 8122  | 4        | 0.016 | 0.016 | 0    | AC=4 | WT      | WT   | WT | Neg |

|       |              |      |                  |           |       |               |                           |   |      |       |          |       |       |      |      |         |      |      |     |
|-------|--------------|------|------------------|-----------|-------|---------------|---------------------------|---|------|-------|----------|-------|-------|------|------|---------|------|------|-----|
| 34123 | SAMN04191826 | 2011 | Alberta          | Male      | 22    | Throat        | AziR/EryR                 |   | 5049 | 9363  | 16       | 0.008 | 0.008 | 0    | AC=4 | WT      | A39T | WT   | Neg |
| 34131 | SAMN04191827 | 2010 | Ontario          | Male      | 23    | Penis/Urethra | PPNG/TRNG/AziR/CipR/EryR  |   | 5343 | 10899 | ≥5<br>12 | 0.063 | 0.032 | AC=4 | 0    | -35ADel | WT   | G45D | Neg |
| 34530 | SAMN04191828 | 2012 | British Columbia | Male      | 41.74 | Penis/Urethra | CMRNG/AziR/CeDS/CxDS/CipR | H | 1407 | 1901  | 2        | 0.125 | 0.25  | 0    | AC=2 | -35ADel | WT   | WT   | Neg |
| 34565 | SAMN04191829 | 2011 | Quebec           | Male      | 23    | Penis/Urethra | CMRNG/AziR/CipR           | J | 757  | 1901  | 4        | 0.063 | 0.032 | 0    | AC=2 | -35ADel | WT   | WT   | Neg |
| 34572 | SAMN04191830 | 2011 | Quebec           | Female    | 23    | Cervix        | CMRNG/AziR/CipR           | I | 3150 | 11427 | 8        | 0.063 | 0.032 | 0    | AC=3 | -35ADel | WT   | WT   | Neg |
| 34600 | SAMN04191831 | 2011 | Quebec           | Female    | 22    | Throat        | AziR/EryR/TetR            | B | 7199 | 9363  | 16       | 0.016 | 0.032 | 0    | AC=4 | WT      | A39T | WT   | Neg |
| 34605 | SAMN04191832 | 2011 | Quebec           | Male      | 31    | Penis/Urethra | AziR/EryR                 | B | 7199 | 9363  | 16       | 0.016 | 0.032 | 0    | AC=4 | WT      | A39T | WT   | Neg |
| 34615 | SAMN04191833 | 2011 | Quebec           | Male      | 20    | Penis/Urethra | AziR/EryR                 | B | 8035 | 9363  | 16       | 0.008 | 0.016 | 0    | AC=4 | WT      | A39T | WT   | Neg |
| 34638 | SAMN04191834 | 2011 | Quebec           | Male      | 31    | Rectum        | EryR                      |   | 2992 | 9363  | 1        | 0.016 | 0.032 | 0    | 0    | WT      | A39T | WT   | Neg |
| 34639 | SAMN04191835 | 2011 | Quebec           | Male      | 44    | Penis/Urethra | CMRNG/AziR/CipR           | J | 437  | 1901  | 16       | 0.032 | 0.032 | 0    | AC=4 | -35ADel | WT   | WT   | Neg |
| 34745 | SAMN04191836 | 2011 | Nova Scotia      | Male      | 26    | Penis/Urethra | AziR/EryR/TetR            |   | 2992 | 9363  | 4        | 0.008 | 0.016 | 0    | AC=3 | WT      | A39T | WT   | Neg |
| 34842 | SAMN04191837 | 2012 | France           | Not Given |       | Not Given     | Neisseria gonorrhoeae     | H | 1407 | 1901  | 0.5      | 2     | ≥4    | 0    | 0    | -35ADel | WT   | WT   | Neg |
| 34851 | SAMN04191838 | 2011 | Quebec           | Male      | 39    | Rectum        | EryR                      |   | 2992 | 9363  | 1        | 0.008 | 0.016 | 0    | 0    | WT      | A39T | WT   | Neg |
| 35042 | SAMN04191839 | 2012 | Alberta          | Male      | 30    | Penis/Urethra | AziR/EryR/TetR            |   | 3935 | 9363  | 8        | 0.032 | 0.032 | 0    | AC=3 | WT      | A39T | WT   | Neg |
| 35211 | SAMN04191840 | 2011 | Ontario          | Male      | 30    | Not Given     | CMRNG/AziR/CipR           |   | 4991 | 7367  | 2        | 0.032 | 0.032 | 0    | 0    | -35ADel | WT   | G45D | Neg |
| 35410 | SAMN04191841 | 2012 | British Columbia | Male      | 55.48 | Rectum        | CMRNG/AziR/CipR           |   | 8690 | 1579  | ≥5<br>12 | 0.032 | 0.016 | AC=4 | 0    | -35ADel | WT   | WT   | Neg |
| 35435 | SAMN04191842 | 2012 | Ontario          | Male      | 55    | Throat        | CMRNG/AziR/CxDS/CipR      | H | 3158 | 1901  | 8        | 0.125 | 0.125 | 0    | AC=4 | -35ADel | WT   | WT   | Neg |
| 35442 | SAMN04191843 | 2012 | Ontario          | Male      | 72    | Penis/Urethra | CMRNG/AziR/CipR           |   | 7986 | 7827  | 8        | 0.063 | 0.063 | 0    | AC=4 | -35ADel | WT   | G45D | Neg |
| 35443 | SAMN04191844 | 2012 | Ontario          | Male      | 23    | Penis/Urethra | CMRNG/AziR/CipR           |   | 7986 | 7827  | 8        | 0.063 | 0.063 | 0    | AC=4 | -35ADel | WT   | G45D | Neg |
| 35444 | SAMN04191845 | 2012 | Ontario          | Male      | 20    | Penis/Urethra | AziR/EryR/TetR            |   | 8203 | 11424 | 16       | 0.016 | 0.016 | 0    | AC=4 | WT      | A39T | WT   | Neg |
| 35507 | SAMN04191846 | 2012 | Quebec           | Male      | 31    | Penis/Urethra | AziR/EryR/TetR            |   | 5650 | 1893  | 0.25     | 0.016 | 0.032 | 0    | AC=1 | -35ADel | WT   | WT   | Neg |
| 35541 | SAMN04191847 | 2012 | Quebec           | Male      | 31    | Throat        | AziR/EryR/TetR            | A | 2992 | 9363  | 8        | 0.016 | 0.016 | 0    | AC=4 | WT      | A39T | WT   | Neg |
| 35570 | SAMN04191848 | 2012 | Quebec           | Male      | 30    | Penis/Urethra | CMRNG/AziR/CipR           | H | 1407 | 1901  | 16       | 0.063 | 0.125 | 0    | AC=4 | -35ADel | WT   | WT   | Neg |
| 35594 | SAMN04191849 | 2012 | Quebec           | Male      | 31    | Rectum        | AziR/EryR/TetR            | B | 7199 | 9363  | 16       | 0.032 | 0.063 | 0    | AC=4 | WT      | A39T | WT   | Neg |
| 35809 | SAMN04191850 | 2012 | Ontario          | Male      | 57.67 | Penis/Urethra | CMRNG/AziR/CxDS/CipR      | H | 3158 | 1901  | 8        | 0.125 | 0.125 | 0    | AC=4 | -35ADel | WT   | WT   | Neg |
| 35835 | SAMN04191851 | 2012 | Ontario          | Male      | 43.21 | Penis/Urethra | CMRNG/AziR/CxDS/CipR      | H | 3158 | 1901  | 16       | 0.125 | 0.125 | 0    | AC=4 | -35ADel | WT   | WT   | Neg |
| 35846 | SAMN04191852 | 2012 | Ontario          | Male      | 32.09 | Penis/Urethra | CMRNG/AziR/CxDS/CipR      | H | 3158 | 1901  | 8        | 0.125 | 0.125 | 0    | AC=4 | -35ADel | WT   | WT   | Neg |
| 35908 | SAMN04191853 | 2013 | British Columbia | Male      | 51.16 | Penis/Urethra | AziR/EryR/TetR            |   | 8915 | 9363  | 16       | 0.016 | 0.016 | 0    | AC=4 | WT      | A39T | WT   | Neg |
| 35917 | SAMN04191854 | 2012 | Ontario          | Male      | 27.08 | Penis/Urethra | CMRNG/AziR/CxDS/CipR      | H | 3158 | 1901  | 8        | 0.125 | 0.125 | 0    | AC=4 | -35ADel | WT   | WT   | Neg |
| 35987 | SAMN04191855 | 2012 | Ontario          | Male      | 23.17 | Rectum        | CMRNG/AziR/CxDS/CipR      | H | 3158 | 1901  | 8        | 0.125 | 0.125 | 0    | AC=4 | -35ADel | WT   | WT   | Neg |
| 36021 | SAMN04191856 | 2013 | Ontario          | Male      | 23.23 | Rectum        | CMRNG/AziR/CeDS/CxDS/CipR | H | 3158 | 1901  | 8        | 0.125 | 0.25  | 0    | AC=4 | -35ADel | WT   | WT   | Neg |
| 36029 | SAMN04191857 | 2013 | Ontario          | Female    | 46.74 | Vagina        | CMRNG/AziR/CeDS/CxDS/CipR | H | 3158 | 1901  | 8        | 0.125 | 0.25  | 0    | AC=4 | -35ADel | WT   | WT   | Neg |
| 36037 | SAMN04191858 | 2013 | Ontario          | Female    | 22.47 | Throat        | CMRNG/AziR/CxDS/CipR      | H | 3158 | 1901  | 8        | 0.125 | 0.125 | 0    | AC=4 | -35ADel | WT   | WT   | Neg |
| 36045 | SAMN04191859 | 2013 | Ontario          | Male      | 25.22 | Penis/Urethra | Probable CMRNG/AziR/CipR  |   | 9436 | 1901  | 8        | 0.032 | 0.016 | 0    | AC=4 | -35ADel | WT   | WT   | Neg |
| 36058 | SAMN04191860 | 2013 | Ontario          | Male      | 22.09 | Penis/Urethra | CMRNG/AziR/CxDS/CipR      | H | 3158 | 1901  | 8        | 0.125 | 0.125 | 0    | AC=4 | -35ADel | WT   | WT   | Neg |
| 36160 | SAMN04191861 | 2012 | Quebec           | Male      | 34    | Rectum        | AziR/EryR/TetR            | A | 2992 | 9363  | 8        | 0.008 | 0.008 | 0    | AC=4 | WT      | A39T | WT   | Pos |
| 36171 | SAMN04191862 | 2012 | Quebec           | Male      | 21    | Rectum        | AziR/EryR/TetR            | A | 2992 | 9363  | 8        | 0.008 | 0.032 | 0    | AC=4 | WT      | A39T | WT   | Pos |
| 36172 | SAMN04191863 | 2012 | Quebec           | Male      | 43    | Penis/Urethra | AziR/EryR/TetR            | A | 2992 | 9363  | 8        | 0.004 | 0.008 | 0    | AC=4 | WT      | A39T | WT   | Pos |
| 36182 | SAMN04191864 | 2012 | Quebec           | Male      | 23    | Penis/Urethra | AziR/EryR/TetR            | A | 2992 | 9363  | 8        | 0.008 | 0.008 | 0    | AC=4 | WT      | A39T | WT   | Neg |
| 36192 | SAMN04191865 | 2012 | Quebec           | Male      | 21    | Penis/Urethra | AziR/EryR/TetR            | A | 2992 | 9363  | 8        | 0.008 | 0.008 | 0    | AC=4 | WT      | A39T | WT   | Neg |
| 36293 | SAMN04191866 | 2012 | Quebec           | Male      | 38    | Rectum        | AziR/EryR/TetR            | A | 2992 | 9363  | 2        | 0.008 | 0.008 | 0    | AC=2 | WT      | A39T | WT   | Neg |
| 36294 | SAMN04191867 | 2012 | Quebec           | Male      | 49    | Penis/Urethra | AziR/EryR/TetR            | A | 2992 | 9363  | 2        | 0.008 | 0.008 | 0    | AC=2 | WT      | A39T | WT   | Neg |
| 36296 | SAMN04191868 | 2012 | Quebec           | Male      | 47    | Penis/Urethra | AziR/EryR/TetR            | A | 2992 | 9363  | 8        | 0.008 | 0.008 | 0    | AC=4 | WT      | A39T | WT   | Neg |

|       |              |      |                     |        |       |               |                               |   |       |       |       |       |       |   |      |                |      |      |     |
|-------|--------------|------|---------------------|--------|-------|---------------|-------------------------------|---|-------|-------|-------|-------|-------|---|------|----------------|------|------|-----|
| 36350 | SAMN04191869 | 2013 | Saskatchewan        | Female | 28.95 | Cervix        | Probable<br>CMRNG/AziR/CipR   | H | 9427  | 1901  | 8     | 0.032 | 0.125 | 0 | AC=4 | -35ADel        | WT   | WT   | Neg |
| 36361 | SAMN04191870 | 2013 | British<br>Columbia | Male   | 53.15 | Penis/Urethra | AziR/EryR/TetR                |   | 8915  | 9363  | 16    | 0.016 | 0.032 | 0 | AC=4 | WT             | A39T | WT   | Neg |
| 36391 | SAMN04191871 | 2012 | Quebec              | Male   | 29    | Penis/Urethra | CMRNG/AziR/CipR               | L | 6360  | 7363  | 8     | 0.063 | 0.063 | 0 | AC=3 | -35ADel        | WT   | WT   | Neg |
| 36441 | SAMN04191872 | 2013 | Saskatchewan        | Female | 18.69 | Cervix        | AziR/CipR/EryR/TetR           | H | 9427  | 1901  | 8     | 0.032 | 0.063 | 0 | AC=4 | -35ADel        | WT   | WT   | Neg |
| 36442 | SAMN04191873 | 2013 | Saskatchewan        | Male   | 23.05 | Penis/Urethra | CMRNG/AziR/CipR               | H | 9427  | 1901  | 8     | 0.063 | 0.125 | 0 | AC=4 | -35ADel        | WT   | WT   | Pos |
| 36443 | SAMN04191874 | 2013 | Saskatchewan        | Female | 21.93 | Cervix        | AziR/CipR/EryR/TetR           | H | 9427  | 1901  | 8     | 0.063 | 0.125 | 0 | AC=4 | -35ADel        | WT   | WT   | Neg |
| 36650 | SAMN04191875 | 2013 | Saskatchewan        | Male   | 26.17 | Penis/Urethra | AziR/CeDS/CipR/EryR<br>/TetR  | H | 9427  | 1901  | 8     | 0.063 | 0.25  | 0 | AC=4 | -35ADel        | WT   | WT   | Neg |
| 36690 | SAMN04191876 | 2013 | Saskatchewan        | Male   | 31.3  | Penis/Urethra | CMRNG/AziR/CipR               | H | 9427  | 1901  | 8     | 0.063 | 0.063 | 0 | AC=4 | -35ADel        | WT   | WT   | Neg |
| 36746 | SAMN04191877 | 2013 | Alberta             | Male   | 35    | Throat        | Probable<br>CMRNG/AziR        | E | 3935  | 9363  | 2     | 0.032 | 0.016 | 0 | 0    | menigitidis    | WT   | WT   | Neg |
| 36945 | SAMN04191878 | 2013 | Quebec              | Female | 15    | Rectum        | AziR/EryR/TetR                | D | 9047  | 9363  | 8     | 0.004 | 0.008 | 0 | AC=4 | WT             | A39T | WT   | Neg |
| 36946 | SAMN04191879 | 2013 | Quebec              | Male   | 22    | Rectum        | AziR/EryR                     | A | 2992  | 9363  | 16    | 0.004 | 0.008 | 0 | AC=4 | WT             | A39T | WT   | Neg |
| 36948 | SAMN04191880 | 2013 | Quebec              | Female | 25    | Throat        | AziR/EryR                     | A | 2992  | 9363  | 8     | 0.004 | 0.008 | 0 | AC=4 | WT             | A39T | WT   | Neg |
| 36952 | SAMN04191881 | 2013 | Quebec              | Male   | 34    | Rectum        | AziR/EryR                     | C | 8015  | 9363  | 2     | 0.004 | 0.008 | 0 | 0    | WHO-P-<br>like | A39T | WT   | Neg |
| 37021 | SAMN04191882 | 2013 | British<br>Columbia | Male   | 30.72 | Penis/Urethra | CMRNG/AziR/CeDS/C<br>xDS/CipR | H | 3158  | 1901  | 16    | 0.25  | 0.25  | 0 | AC=4 | -35ADel        | WT   | WT   | Neg |
| 37086 | SAMN04191883 | 2013 | Alberta             | Male   | 26    | Penis/Urethra | CMRNG/AziR                    | E | 6765  | 9363  | 2     | 0.032 | 0.032 | 0 | 0    | menigitidis    | WT   | WT   | Neg |
| 37088 | SAMN04191884 | 2013 | Alberta             | Male   | 27    | Rectum        | CMRNG/AziR                    | E | 6765  | 9363  | 2     | 0.032 | 0.016 | 0 | 0    | menigitidis    | WT   | WT   | Neg |
| 37094 | SAMN04191885 | 2013 | Alberta             | Male   | 37    | Penis/Urethra | CMRNG/AziR/CipR               | L | 10128 | 7363  | 8     | 0.032 | 0.032 | 0 | AC=4 | -35ADel        | WT   | WT   | Neg |
| 37308 | SAMN04191886 | 2013 | Ontario             | Male   | 26.1  | Penis/Urethra | CMRNG/AziR/CipR               | H | 3158  | 1901  | 16    | 0.063 | 0.063 | 0 | AC=4 | -35ADel        | WT   | WT   | Neg |
| 37320 | SAMN04191887 | 2013 | Ontario             | Male   | 24.13 | Penis/Urethra | CMRNG/AziR/CipR               | H | 3158  | 1901  | 16    | 0.063 | 0.125 | 0 | AC=4 | -35ADel        | WT   | WT   | Neg |
| 37327 | SAMN04191888 | 2013 | Ontario             | Male   | 24.11 | Penis/Urethra | CMRNG/AziR/CeDS/C<br>xDS/CipR | H | 1407  | 1901  | 2     | 0.125 | 0.5   | 0 | AC=2 | -35ADel        | WT   | WT   | Neg |
| 37350 | SAMN04191889 | 2013 | Ontario             | Male   | 27.72 | Rectum        | CMRNG/AziR                    | K | 1034  | 1579  | 2     | 0.032 | 0.032 | 0 | 0    | -35ADel        | WT   | WT   | Neg |
| 37413 | SAMN04191890 | 2013 | Ontario             | Male   | 23.88 | Penis/Urethra | CMRNG/AziR                    | K | 9700  | 1579  | 2     | 0.032 | 0.032 | 0 | 0    | -35ADel        | WT   | WT   | Neg |
| 37456 | SAMN04191891 | 2013 | Ontario             | Male   | 22.72 | Rectum        | CMRNG/AziR/CipR               | H | 3158  | 1901  | 8     | 0.063 | 0.125 | 0 | AC=4 | -35ADel        | WT   | WT   | Neg |
| 37510 | SAMN04191892 | 2013 | Ontario             | Male   | 23.93 | Rectum        | CMRNG/AziR/CipR               | H | 3158  | 1901  | 16    | 0.063 | 0.125 | 0 | AC=4 | -35ADel        | WT   | WT   | Neg |
| 37535 | SAMN04191893 | 2014 | Ontario             | Male   | 21.01 | Rectum        | CMRNG/AziR/CipR               | H | 3158  | 1901  | 8     | 0.063 | 0.125 | 0 | AC=4 | -35ADel        | WT   | WT   | Neg |
| 37540 | SAMN04191894 | 2014 | Ontario             | Male   | 23.87 | Penis/Urethra | CMRNG/AziR/CipR               | H | 10451 | 1901  | 4     | 0.032 | 0.063 | 0 | AC=3 | -35ADel        | WT   | WT   | Neg |
| 37576 | SAMN04191895 | 2013 | Quebec              | Male   | 22    | Penis/Urethra | AziR/EryR/TetR                | F | 1929  | 8126  | 8     | 0.004 | 0.004 | 0 | AC=4 | WT             | WT   | G45D | Neg |
| 37599 | SAMN04191896 | 2013 | Quebec              | Female | 32    | Cervix        | AziR/EryR/TetR                | D | 9047  | 9363  | 8     | 0.008 | 0.016 | 0 | AC=4 | WT             | A39T | WT   | Neg |
| 37624 | SAMN04191897 | 2013 | Quebec              | Male   | 23    | Penis/Urethra | AziR/EryR/TetR                | C | 9368  | 11428 | 2     | 0.008 | 0.032 | 0 | 0    | menigitidis    | WT   | WT   | Neg |
| 37635 | SAMN04191898 | 2013 | Quebec              | Female | 25    | Cervix        | AziR/CipR/EryR                | I | 9994  | 1901  | 0.063 | 0.008 | 0.032 | 0 | 0    | -35ADel        | WT   | WT   | Neg |
| 37649 | SAMN04191899 | 2013 | Quebec              | Male   | 20    | Penis/Urethra | AziR/EryR/TetR                | C | 9368  | 11428 | 4     | 0.008 | 0.016 | 0 | 0    | menigitidis    | WT   | WT   | Neg |
| 37654 | SAMN04191900 | 2013 | Quebec              | Male   | 25    | Penis/Urethra | AziR/EryR/TetR                | C | 9368  | 11428 | 4     | 0.008 | 0.008 | 0 | 0    | menigitidis    | WT   | WT   | Neg |
| 37748 | SAMN04191901 | 2014 | Alberta             | Male   | 19    | Throat        | Probable<br>CMRNG/AziR/CipR   | L | 10128 | 7363  | 8     | 0.032 | 0.032 | 0 | AC=4 | -35ADel        | WT   | WT   | Neg |
| 37750 | SAMN04191902 | 2014 | Alberta             | Male   | 20    | Throat        | AziR/CipR/EryR/TetR           | L | 10128 | 7363  | 8     | 0.032 | 0.032 | 0 | AC=4 | -35ADel        | WT   | WT   | Neg |
| 37790 | SAMN04191903 | 2014 | Alberta             | Male   | 39    | Rectum        | Probable<br>CMRNG/AziR        | E | 6765  | 9363  | 2     | 0.032 | 0.032 | 0 | 0    | menigitidis    | WT   | WT   | Neg |
| 37867 | SAMN04191904 | 2014 | Ontario             | Male   | 51.26 | Penis/Urethra | CMRNG/AziR/CipR               | H | 10451 | 1901  | 8     | 0.032 | 0.125 | 0 | AC=2 | -35ADel        | WT   | WT   | Neg |
| 37868 | SAMN04191905 | 2014 | Ontario             | Male   | 25.13 | Penis/Urethra | CMRNG/AziR/CipR               | H | 3158  | 1901  | 8     | 0.063 | 0.125 | 0 | AC=4 | -35ADel        | WT   | WT   | Neg |
| 38129 | SAMN04191906 | 2014 | Quebec              | Male   | 28    | Penis/Urethra | AziR/EryR                     | F | 10567 | 8126  | 8     | 0.004 | 0.008 | 0 | AC=4 | WT             | WT   | WT   | Neg |
| 38130 | SAMN04191907 | 2014 | Quebec              | Male   | 34    | Penis/Urethra | CMRNG/AziR/CipR               | H | 3149  | 1901  | 16    | 0.063 | 0.125 | 0 | AC=4 | -35ADel        | WT   | WT   | Neg |
| 38131 | SAMN04191908 | 2014 | Quebec              | Male   | 19    | Penis/Urethra | CMRNG/AziR/CxDS/C<br>ipR      | H | 1407  | 1901  | 2     | 0.125 | 0.125 | 0 | 0    | -35ADel        | WT   | WT   | Neg |
| 38132 | SAMN04191909 | 2014 | Quebec              | Male   | 20    | Throat        | AziR/CipR/EryR/TetR           | L | 2400  | 7363  | 2     | 0.016 | 0.032 | 0 | 0    | -35ADel        | WT   | WT   | Neg |
| 38133 | SAMN04191910 | 2014 | Quebec              | Male   | 28    | Penis/Urethra | AziR/EryR                     | F | 10567 | 8126  | 8     | 0.004 | 0.008 | 0 | AC=4 | WT             | WT   | WT   | Neg |
| 38134 | SAMN04191911 | 2014 | Quebec              | Male   | 27    | Throat        | AziR/EryR                     | F | 10567 | 8126  | 8     | 0.004 | 0.008 | 0 | AC=4 | WT             | WT   | WT   | Neg |

|               |              |      |              |        |       |               |                        |   |       |       |           |        |        |   |      |                |      |      |     |
|---------------|--------------|------|--------------|--------|-------|---------------|------------------------|---|-------|-------|-----------|--------|--------|---|------|----------------|------|------|-----|
| 38135         | SAMN04191912 | 2014 | Quebec       | Male   | 24    | Throat        | AziR/EryR/TetR         | F | 10567 | 8126  | 8         | 0.008  | 0.016  | 0 | AC=4 | WT             | WT   | WT   | Neg |
| 38136         | SAMN04191913 | 2014 | Quebec       | Male   | 22    | Penis/Urethra | AziR/EryR/TetR         | F | 10567 | 8126  | 8         | 0.004  | 0.008  | 0 | AC=4 | WT             | WT   | WT   | Neg |
| 38137         | SAMN04191914 | 2014 | Quebec       | Male   | 27    | Throat        | AziR/EryR              | F | 10567 | 8126  | 8         | 0.004  | 0.008  | 0 | AC=4 | WT             | WT   | WT   | Neg |
| 38138         | SAMN04191915 | 2014 | Quebec       | Male   | 22    | Throat        | AziR/EryR              | F | 10567 | 8126  | 8         | 0.008  | 0.004  | 0 | AC=4 | WT             | WT   | WT   | Neg |
| 38139         | SAMN04191916 | 2014 | Quebec       | Male   | 21    | Penis/Urethra | AziR/EryR              | F | 10567 | 8126  | 8         | 0.008  | 0.016  | 0 | AC=4 | WT             | WT   | WT   | Neg |
| 38140         | SAMN04191917 | 2014 | Quebec       | Male   | 23    | Throat        | AziR/EryR              | F | 10568 | 1893  | 8         | 0.004  | 0.004  | 0 | AC=4 | WT             | WT   | G45D | Neg |
| 38141         | SAMN04191918 | 2014 | Quebec       | Male   | 23    | Penis/Urethra | Probable<br>CMRNG/AziR | E | 7571  | 9363  | 4         | 0.032  | 0.016  | 0 | 0    | menigitidis    | WT   | WT   | Neg |
| 38142         | SAMN04191919 | 2014 | Quebec       | Male   | 34    | Throat        | AziR/EryR/TetR         | F | 10567 | 8126  | 8         | 0.004  | 0.016  | 0 | AC=4 | WT             | WT   | WT   | Neg |
| 38143         | SAMN04191920 | 2014 | Quebec       | Male   | 38    | Rectum        | AziR/EryR              | F | 10567 | 8126  | 8         | 0.008  | 0.008  | 0 | AC=4 | WT             | WT   | WT   | Neg |
| 38144         | SAMN04191921 | 2014 | Quebec       | Male   | 24    | Throat        | AziR/EryR/TetR         | C | 9368  | 11428 | 2         | 0.008  | 0.016  | 0 | 0    | menigitidis    | WT   | WT   | Neg |
| 38145         | SAMN04191922 | 2014 | Quebec       | Male   | 53    | Penis/Urethra | AziR/EryR/TetR         | C | 9368  | 11428 | 2         | 0.008  | 0.016  | 0 | 0    | menigitidis    | WT   | WT   | Neg |
| 38150         | SAMN04191923 | 2014 | Quebec       | Male   | 26    | Throat        | AziR/EryR/TetR         | F | 10567 | 8126  | 8         | 0.004  | 0.008  | 0 | AC=4 | WT             | WT   | WT   | Neg |
| 38152         | SAMN04191924 | 2014 | Quebec       | Male   | 29    | Rectum        | AziR/EryR              | F | 10567 | 8126  | 8         | 0.004  | 0.008  | 0 | AC=4 | WT             | WT   | WT   | Neg |
| 38155         | SAMN04191925 | 2014 | Quebec       | Male   | 22    | Throat        | AziR/EryR              | F | 10567 | 8126  | 8         | 0.004  | 0.016  | 0 | AC=4 | WT             | WT   | WT   | Neg |
| 38156         | SAMN04191926 | 2014 | Quebec       | Male   | 33    | Throat        | AziR/EryR/TetR         | C | 9368  | 11428 | 2         | 0.008  | 0.016  | 0 | 0    | menigitidis    | WT   | WT   | Neg |
| 38158         | SAMN04191927 | 2014 | Quebec       | Female | 22    | Throat        | AziR/EryR/TetR         | D | 9047  | 9363  | 8         | 0.008  | 0.032  | 0 | AC=4 | WT             | A39T | WT   | Neg |
| 38196         | SAMN04191928 | 2014 | Quebec       | Female | 19    | Throat        | AziR/EryR/TetR         | D | 10814 | 9363  | 8         | 0.004  | 0.008  | 0 | AC=4 | WT             | A39T | WT   | Neg |
| 38197         | SAMN04191929 | 2014 | Quebec       | Male   | 32    | Penis/Urethra | EryR/TetR              |   | 10815 | 1584  | 1         | 0.008  | 0.008  | 0 | 0    | menigitidis    | WT   | WT   | Neg |
| 38198         | SAMN04191930 | 2014 | Quebec       | Male   | 23    | Penis/Urethra | AziR/EryR              | F | 10567 | 8126  | 4         | 0.004  | 0.008  | 0 | AC=4 | WT             | WT   | WT   | Neg |
| 38199         | SAMN04191931 | 2014 | Quebec       | Female | 19    | Throat        | AziR/EryR              | F | 10567 | 8126  | 8         | 0.004  | 0.008  | 0 | AC=4 | WT             | WT   | WT   | Neg |
| 38200         | SAMN04191932 | 2014 | Quebec       | Male   | 50    | Throat        | Probable<br>CMRNG/AziR | C | 9368  | 11428 | 2         | 0.008  | 0.016  | 0 | 0    | menigitidis    | WT   | WT   | Neg |
| 38201         | SAMN04191933 | 2014 | Quebec       | Male   | 21    | Penis/Urethra | Probable<br>CMRNG/AziR | C | 9368  | 11428 | 2         | 0.008  | 0.016  | 0 | 0    | menigitidis    | WT   | WT   | Neg |
| 38202         | SAMN04191934 | 2014 | Quebec       | Female | 22    | Throat        | AziR/EryR/TetR         | D | 9047  | 9363  | 8         | 0.008  | 0.016  | 0 | AC=4 | WT             | A39T | WT   | Neg |
| 883218        | SAMN04191935 | 1989 | Saskatchewan | Male   | 34.35 | Urethra       | CMRNG/CxDS             |   | 919   | 1927  | 0.5       | 0.125  | 0.125  | 0 | 0    | -35ADel        | WT   | G45D | Neg |
| ATCC4<br>9226 | SAMN04191936 |      | Unknown      |        |       |               |                        |   | 1572  | 11075 | 0.5       | 0.016  | 0.016  | 0 | 0    | WT             | A39T | WT   | Neg |
| WHO-<br>F     | SAMN04191937 | 1991 | Canada       |        |       |               |                        |   | 3303  | 10934 | 0.12<br>5 | <0.002 | <0.016 | 0 | 0    | WT             | WT   | WT   | Neg |
| WHO-<br>G     | SAMN04191938 | 1997 | Thailand     |        |       |               |                        |   | 621   | 1903  | 0.25      | 0.008  |        | 0 | 0    | -35ADel        | WT   | WT   | Neg |
| WHO-<br>K     | SAMN04191939 | 2003 | Japan        |        |       |               |                        |   | 1424  | 7363  | 0.25      | 0.064  | 0.5    | 0 | 0    | -35ADel        | WT   | G45D | Neg |
| WHO-<br>L     | SAMN04191940 | 1996 | Asia         |        |       |               |                        |   | 1422  | 1590  | 0.5       | 0.125  | 0.25   | 0 | 0    | WT             | WT   | G45D | Neg |
| WHO-<br>M     | SAMN04191941 | 1992 | Philippines  |        |       |               |                        |   | 3304  | 7367  | 0.25      | 0.012  | <0.016 | 0 | 0    | -35ADel        | WT   | G45D | Neg |
| WHO-<br>N     | SAMN04191942 | 2001 | Australia    |        |       |               |                        |   | 556   | 1583  | 0.12<br>5 | 0.004  | <0.016 | 0 | 0    | WT             | A39T | WT   | Neg |
| WHO-<br>O     | SAMN04191943 | 1991 | Canada       |        |       |               |                        |   | 495   | 1902  | 0.25      | 0.032  | 0.016  | 0 | 0    | -35ADel        | WT   | WT   | Neg |
| WHO-<br>P     | SAMN04191944 |      | USA          |        |       |               |                        |   | 3305  | 8127  | 2         | 0.004  | <0.016 | 0 | 0    | WHO-P-<br>like | WT   | WT   | Neg |



**Supplemental Table S5: Multiple regression analysis of the correlation of azithromycin minimum inhibitory concentration (MIC) increments to azithromycin resistance molecular markers in *Neisseria gonorrhoeae***

| Molecular marker<br>(independent variable)  | Model 1 (best fit)                 |             |             | Model 2         |             |              |
|---------------------------------------------|------------------------------------|-------------|-------------|-----------------|-------------|--------------|
|                                             | <i>p</i> -value                    | Coefficient | CI (95%)    | <i>p</i> -value | Coefficient | CI (95%)     |
| 23s rRNA A2059G                             | <0.0001                            | 2.11        | 1.95 – 2.28 | <0.0001         | 2.13        | 1.97 – 2.29  |
| 23s rRNA C2611T                             | <0.0001                            | 0.71        | 0.65 – 0.77 | <0.0001         | 0.72        | 0.66 – 0.77  |
| Any <i>mtrR</i> promoter disruption         | <0.0001                            | 0.66        | 0.43 – 0.89 | <0.0001         | 0.90        | 0.62 – 1.18  |
| <i>ermC</i>                                 | <0.0001                            | 4.12        | 2.62 – 5.59 | <0.0001         | 3.80        | 2.37 – 5.22  |
| <i>ermB</i>                                 | Removed from model due to poor fit |             |             | 0.06            | 0.95        | -0.04 – 1.95 |
| MtrR A39T                                   | Removed from model due to poor fit |             |             | 0.0004          | 0.56        | 0.25 – 0.87  |
| MtrR G45D                                   | Removed from model due to poor fit |             |             | 0.09            | -0.26       | -0.57 – 0.04 |
| Adjusted R <sup>2</sup>                     | 0.820                              |             |             | 0.834           |             |              |
| Significance F<br>(overall <i>p</i> -value) | <0.0001                            |             |             | <0.0001         |             |              |

Statistical analysis performed using MS-Excel (Microsoft Corp. 2010). Azithromycin MIC increments increase from  $\leq 0.5 \mu\text{g/mL}$  to  $\geq 512 \mu\text{g/mL}$  corresponding to incremental values of 1 to 11, respectively. 23s rRNA A2059G and C2611T (*E. coli* numbering) variables are the number of alleles with a respective mutation, whereas other molecular markers correlate a presence or absence of the mutation with a value of 1 and 0, respectively. Promoter disruptions of *mtrR* include a -35A deletion, *N. meningitidis*-like and WHO-P-like sequences (Fig. 4). MtrR A39T, G45D and *ermC* variables (model 2) only marginally increased the adjusted R<sup>2</sup> indicating their presence contributes little to the correlation with MIC increment. The multiple regression equation for model 1 is: Estimated azithromycin MIC increment using Model 1 = 1.8 + (2.1 x No. of A2059G alleles) + (0.7 x No. of C2611T alleles) + (4.1 x *ermC*) + (0.7 x *mtrR* promoter disruption). The number of mutated 23s rRNA alleles and the presence of other molecular markers for each isolate are presented in table S4.

**Supplemental Figure S1: Whole genome core single nucleotide polymorphism (SNP) maximum likelihood phylogenetic tree of 459 *Neisseria gonorrhoeae* isolates collected in Canada from 1998 to 2014, and 10 international reference strains.**

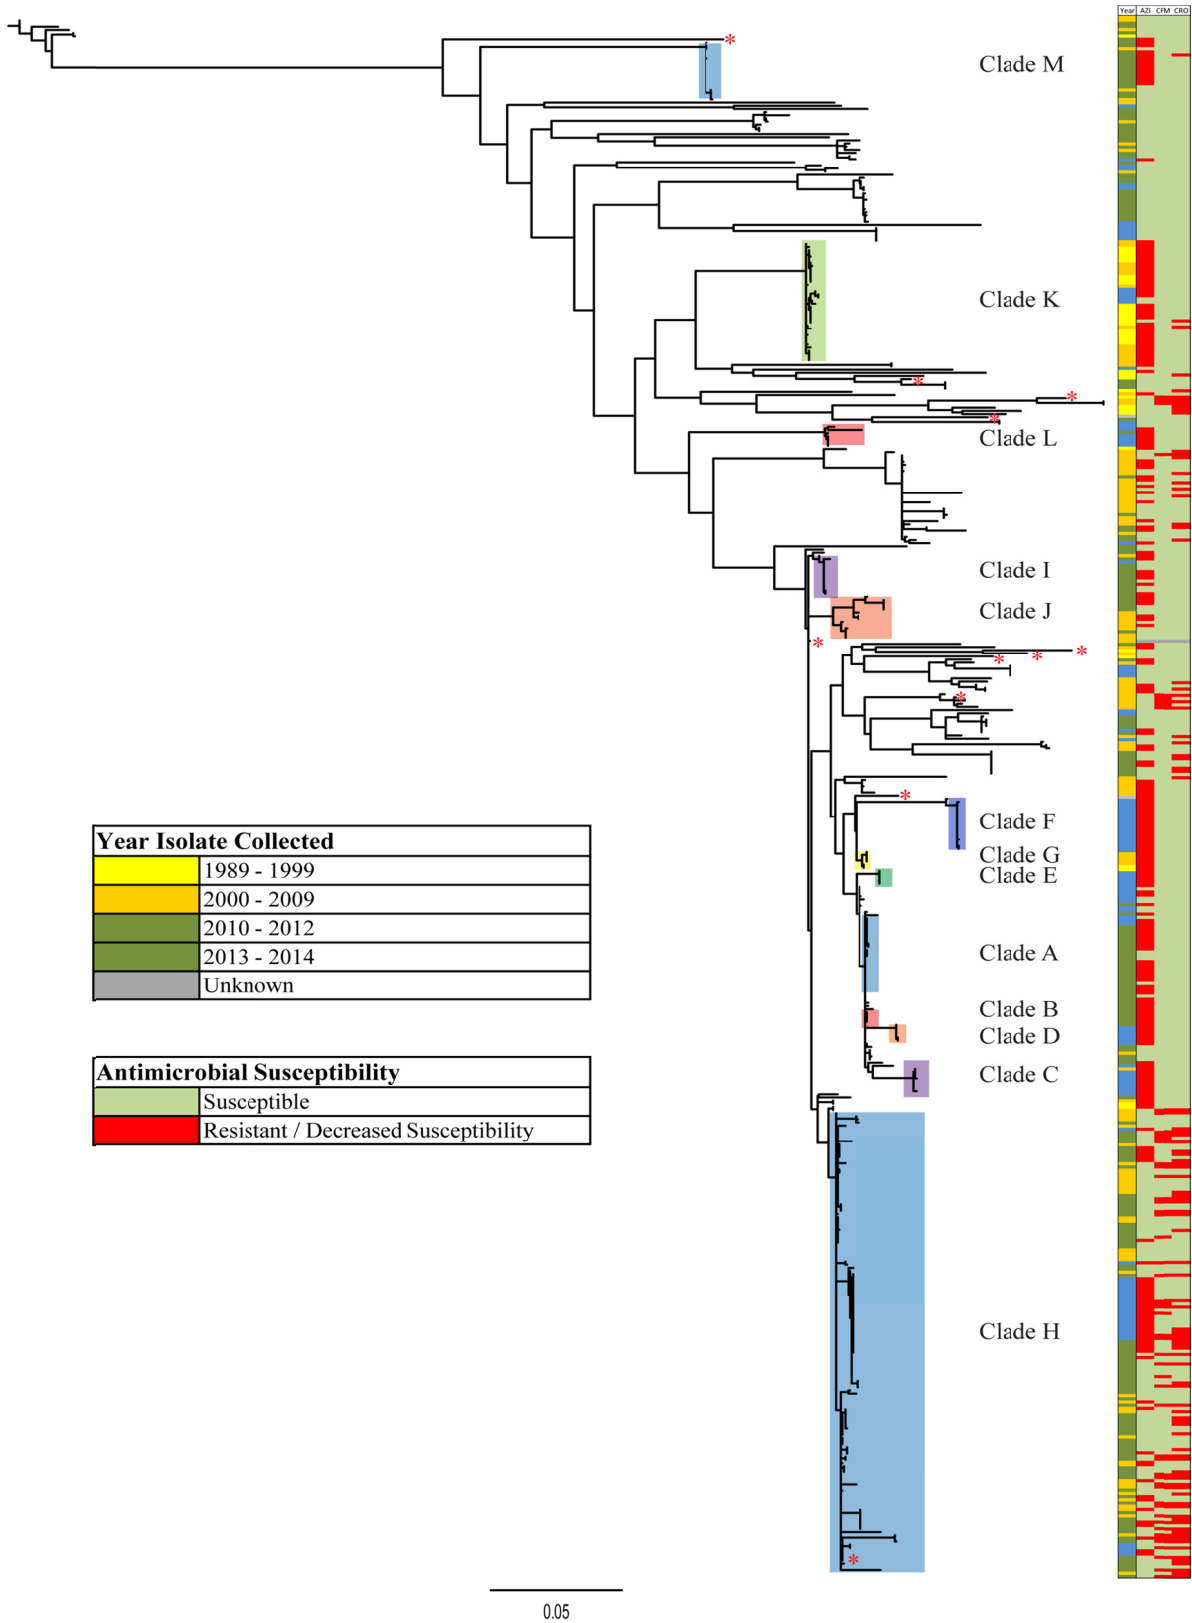

Notes: The length of the scale bar represents the estimated evolutionary divergence between isolates based on the average pairwise distance between strains (number of substitutions in an isolate / total number of core SNPS). Antimicrobial susceptibilities to azithromycin (AZI, MIC  $\leq$  1  $\mu\text{g/ml}$  as susceptible in green [n=249], MIC  $\geq$  2  $\mu\text{g/ml}$  as resistant in red [n=214]), cefixime (CFM, MIC  $\leq$  0.125  $\mu\text{g/ml}$  as susceptible in green [n=416], MIC  $\geq$  0.25  $\mu\text{g/ml}$  as decreased susceptibility in red [n=54]), and ceftriaxone (CRO, MIC  $\leq$  0.063  $\mu\text{g/ml}$  as susceptible in green [n=371], MIC  $\geq$  0.125  $\mu\text{g/ml}$  as decreased susceptibility in red [n=99]) are shown. Red asterisks on a node indicate international *N. gonorrhoeae* reference strains (from top to bottom): WHO-F, WHO-O, WHO-L, ATCC19226, NCCP11945, WHO-G, WHO-N, WHO-M, WHO-K, WHO-P and France F89. Clade annotations represent lineages determined with all AZI resistant (n=214) and a subset of susceptible (n=32) isolates that is depicted in Figure 1 of the main manuscript.

**Supplemental Figure S2: Aligned nucleotide sequences of the peptidyltransferase loop region in domain V of 23S rRNA.**

| Sequence ID <sup>a</sup> | Start <sup>b</sup> | Nucleotide Sequence                                                                                                                                       | End <sup>d</sup> |
|--------------------------|--------------------|-----------------------------------------------------------------------------------------------------------------------------------------------------------|------------------|
| FA1090 Allele 1          | 2054               | TAGACGGAAGACCCTCGAACCTTTACTGTAGCTTTGCATTGGACCTTTGAAGTCACCTTGTTGATAGGATAGTGGGAAGGCTTGGAAAGCAAGACGCCAGCTCTCTGTGGAGTCGTCCTTGAAAAATACCACCTGGTGTCTTTGAGGTTCTAA | 2203             |
| FA1090 Allele 2          | 2051               | TAGACGGAAGACCCTCGAACCTTTACTGTAGCTTTGCATTGGACCTTTGAAGTCACCTTGTTGATAGGATAGTGGGAAGGCTTGGAAAGCAAGACGCCAGCTCTCTGTGGAGTCGTCCTTGAAAA-TACCACCTGGTGTCTTTGAGGTTCTAA | 2199             |
| FA1090 Allele 3          | 2050               | TAGACGGAAGACCCTCGAACCTTTACTGTAGCTTTGCATTGGACCTTTGAAGTCACCTTGTTGATAGGATAGTGGGAAGGCTTGGAAAGCAAGACGCCAGCTCTCTGTGGAGTCGTCCTTGAAAA-TACCACCTGGTGTCTTTGAGGTTCTAA | 2198             |
| FA1090 Allele 4          | 2050               | TAGACGGAAGACCCTCGAACCTTTACTGTAGCTTTGCATTGGACCTTTGAAGTCACCTTGTTGATAGGATAGTGGGAAGGCTTGGAAAGCAAGACGCCAGCTCTCTGTGGAGTCGTCCTTGAAAA-TACCACCTGGTGTCTTTGAGGTTCTAA | 2198             |
| NCCP11945 Allele 4       | 2037               | TAGACGGAAGACCCTCGAACCTTTACTGTAGCTTTGCATTGGACCTTTGAAGTCACCTTGTTGATAGGATAGTGGGAAGGCTTGGAAAGCAAGACGCCAGCTCTCTGTGGAGTCGTCCTTGAAAA-TACCACCTGGTGTCTTTGAGGTTCTAA | 2185             |
| 35410                    | 2037               | TAGACGGAAGACCCTCGAACCTTTACTGTAGCTTTGCATTGGACCTTTGAAGTCACCTTGTTGATAGGATAGTGGGAAGGCTTGGAAAGCAAGACGCCAGCTCTCTGTGGAGTCGTCCTTGAAAA-TACCACCTGGTGTCTTTGAGGTTCTAA | 2185             |
| 32380                    | 2037               | TAGACGGAAGACCCTCGAACCTTTACTGTAGCTTTGCATTGGACCTTTGAAGTCACCTTGTTGATAGGATAGTGGGAAGGCTTGGAAAGCAAGACGCCAGCTCTCTGTGGAGTCGTCCTTGAAAA-TACCACCTGGTGTCTTTGAGGTTCTAA | 2185             |
| E. coli                  | 2051               | AAGACGGAAGACCCTCGAACCTTTACTGTAGCTTTGCATTGGACCTTTGAAGTCACCTTGTTGATAGGATAGTGGGAAGGCTTGGAAAGCAAGACGCCAGCTCTCTGTGGAGTCGTCCTTGAAAA-TACCACCTGGTGTCTTTGAGGTTCTAA | 2199             |
| H. pylori                | 2135               | AAGACGGAAGACCCTCGAACCTTTACTGTAGCTTTGCATTGGACCTTTGAAGTCACCTTGTTGATAGGATAGTGGGAAGGCTTGGAAAGCAAGACGCCAGCTCTCTGTGGAGTCGTCCTTGAAAA-TACCACCTGGTGTCTTTGAGGTTCTAA | 2283             |
| FA1090 Allele 1          | 2204               | CCACAGCCGTCATCCGCGTCCGGGACCCGTGCATGGTGGGAGCTTTGACTGGGGCGGCTCCCTCCCAAAGCGTAACGGAGAGAGTTCGAAGGTTACTAGGTCGCGTCCGGAATCCGACTGATAGTGCAATGGCAAAGGTAGCTAACTG      | 2353             |
| FA1090 Allele 2          | 2200               | CCACAGCCGTCATCCGCGTCCGGGACCCGTGCATGGTGGGAGCTTTGACTGGGGCGGCTCCCTCCCAAAGCGTAACGGAGAGAGTTCGAAGGTTACTAGGTCGCGTCCGGAATCCGACTGATAGTGCAATGGCAAAGGTAGCTAACTG      | 2349             |
| FA1090 Allele 3          | 2199               | CCACAGCCGTCATCCGCGTCCGGGACCCGTGCATGGTGGGAGCTTTGACTGGGGCGGCTCCCTCCCAAAGCGTAACGGAGAGAGTTCGAAGGTTACTAGGTCGCGTCCGGAATCCGACTGATAGTGCAATGGCAAAGGTAGCTAACTG      | 2348             |
| FA1090 Allele 4          | 2199               | CCACAGCCGTCATCCGCGTCCGGGACCCGTGCATGGTGGGAGCTTTGACTGGGGCGGCTCCCTCCCAAAGCGTAACGGAGAGAGTTCGAAGGTTACTAGGTCGCGTCCGGAATCCGACTGATAGTGCAATGGCAAAGGTAGCTAACTG      | 2348             |
| NCCP11945 Allele 4       | 2186               | CCACAGCCGTCATCCGCGTCCGGGACCCGTGCATGGTGGGAGCTTTGACTGGGGCGGCTCCCTCCCAAAGCGTAACGGAGAGAGTTCGAAGGTTACTAGGTCGCGTCCGGAATCCGACTGATAGTGCAATGGCAAAGGTAGCTAACTG      | 2335             |
| 35410                    | 2186               | CCACAGCCGTCATCCGCGTCCGGGACCCGTGCATGGTGGGAGCTTTGACTGGGGCGGCTCCCTCCCAAAGCGTAACGGAGAGAGTTCGAAGGTTACTAGGTCGCGTCCGGAATCCGACTGATAGTGCAATGGCAAAGGTAGCTAACTG      | 2335             |
| 32380                    | 2186               | CCACAGCCGTCATCCGCGTCCGGGACCCGTGCATGGTGGGAGCTTTGACTGGGGCGGCTCCCTCCCAAAGCGTAACGGAGAGAGTTCGAAGGTTACTAGGTCGCGTCCGGAATCCGACTGATAGTGCAATGGCAAAGGTAGCTAACTG      | 2335             |
| E. coli                  | 2200               | CSTTGCACCCTAATCCGCGTCCGGGACCCGTGCATGGTGGGAGCTTTGACTGGGGCGGCTCCCTCCCAAAGCGTAACGGAGAGAGTTCGAAGGTTACTAGGTCGCGTCCGGAATCCGACTGATAGTGCAATGGCAAAGGTAGCTAACTG     | 2349             |
| H. pylori                | 2284               | CGTGCCTGTTATCCACAGGACCGCAATGCTGGTGGGAGTTGACTGGGGCGGCTCCCTCCCAAAGCGTAACGGAGAGAGTTCGAAGGTTACTAGGTCGCGTCCGGAATCCGACTGATAGTGCAATGGCAAAGGTAGCTAACTG            | 2433             |
| FA1090 Allele 1          | 2354               | CSAGACCCACAAGTCCGGCAGCTCCGAAGCAGGACATAGTGTCCGGTGGTCTGATGGGAAGGCCATCGCTCAACGGATAAAAAGTACTCCGGGATAACAGGCTTGAATCCGCCAAGAGTTTCAATCCAGCCGGGAGTTGGCAC           | 2503             |
| FA1090 Allele 2          | 2350               | CSAGACCCACAAGTCCGGCAGCTCCGAAGCAGGACATAGTGTCCGGTGGTCTGATGGGAAGGCCATCGCTCAACGGATAAAAAGTACTCCGGGATAACAGGCTTGAATCCGCCAAGAGTTTCAATCCAGCCGGGAGTTGGCAC           | 2498             |
| FA1090 Allele 3          | 2349               | CSAGACCCACAAGTCCGGCAGCTCCGAAGCAGGACATAGTGTCCGGTGGTCTGATGGGAAGGCCATCGCTCAACGGATAAAAAGTACTCCGGGATAACAGGCTTGAATCCGCCAAGAGTTTCAATCCAGCCGGGAGTTGGCAC           | 2497             |
| FA1090 Allele 4          | 2349               | CSAGACCCACAAGTCCGGCAGCTCCGAAGCAGGACATAGTGTCCGGTGGTCTGATGGGAAGGCCATCGCTCAACGGATAAAAAGTACTCCGGGATAACAGGCTTGAATCCGCCAAGAGTTTCAATCCAGCCGGGAGTTGGCAC           | 2497             |
| NCCP11945 Allele 4       | 2336               | CSAGACCCACAAGTCCGGCAGCTCCGAAGCAGGACATAGTGTCCGGTGGTCTGATGGGAAGGCCATCGCTCAACGGATAAAAAGTACTCCGGGATAACAGGCTTGAATCCGCCAAGAGTTTCAATCCAGCCGGGAGTTGGCAC           | 2484             |
| 35410                    | 2336               | CSAGACCCACAAGTCCGGCAGCTCCGAAGCAGGACATAGTGTCCGGTGGTCTGATGGGAAGGCCATCGCTCAACGGATAAAAAGTACTCCGGGATAACAGGCTTGAATCCGCCAAGAGTTTCAATCCAGCCGGGAGTTGGCAC           | 2484             |
| 32380                    | 2336               | CSAGACCCACAAGTCCGGCAGCTCCGAAGCAGGACATAGTGTCCGGTGGTCTGATGGGAAGGCCATCGCTCAACGGATAAAAAGTACTCCGGGATAACAGGCTTGAATCCGCCAAGAGTTTCAATCCAGCCGGGAGTTGGCAC           | 2484             |
| E. coli                  | 2350               | CSAGCSTGACCGCCGAGCAGGTCGGAAGCAGGTCATAGTGTCCGGTGGTCTGATGGGAAGGCCATCGCTCAACGGATAAAAAGTACTCCGGGATAACAGGCTTGAATCCGCCAAGAGTTTCAATCCAGCCGGGAGTTGGCAC            | 2498             |
| H. pylori                | 2434               | TAAGACATACAAGTCAAGCAGAGACGAAAGTCCGGTCAATAGTGTCCGGTGGTCTGATGGGAAGGCCATCGCTCAACGGATAAAAAGTACTCCGGGATAACAGGCTTGAATCCGCCAAGAGTTTCAATCCAGCCGGGAGTTGGCAC        | 3029             |
| FA1090 Allele 1          | 2504               | CTCATGTCGCGCTATACATCCTGGGCTGTAGTCGGTCCCAAGGTTATGGCTGTTCGCCATTTTAAAGTGTACGTGAGTGGTGTAAACGTCGCTGAGACAGTTTGGTCCCTATCT                                        | 2623             |
| FA1090 Allele 2          | 2499               | CTCATGTCGCGCTATACATCCTGGGCTGTAGTCGGTCCCAAGGTTATGGCTGTTCGCCATTTTAAAGTGTACGTGAGTGGTGTAAACGTCGCTGAGACAGTTTGGTCCCTATCT                                        | 2617             |
| FA1090 Allele 3          | 2498               | CTCATGTCGCGCTATACATCCTGGGCTGTAGTCGGTCCCAAGGTTATGGCTGTTCGCCATTTTAAAGTGTACGTGAGTGGTGTAAACGTCGCTGAGACAGTTTGGTCCCTATCT                                        | 2616             |
| FA1090 Allele 4          | 2498               | CTCATGTCGCGCTATACATCCTGGGCTGTAGTCGGTCCCAAGGTTATGGCTGTTCGCCATTTTAAAGTGTACGTGAGTGGTGTAAACGTCGCTGAGACAGTTTGGTCCCTATCT                                        | 2616             |
| NCCP11945 Allele 4       | 2485               | CTCATGTCGCGCTATACATCCTGGGCTGTAGTCGGTCCCAAGGTTATGGCTGTTCGCCATTTTAAAGTGTACGTGAGTGGTGTAAACGTCGCTGAGACAGTTTGGTCCCTATCT                                        | 2603             |
| 35410                    | 2485               | CTCATGTCGCGCTATACATCCTGGGCTGTAGTCGGTCCCAAGGTTATGGCTGTTCGCCATTTTAAAGTGTACGTGAGTGGTGTAAACGTCGCTGAGACAGTTTGGTCCCTATCT                                        | 2603             |
| 32380                    | 2485               | CTCATGTCGCGCTATACATCCTGGGCTGTAGTCGGTCCCAAGGTTATGGCTGTTCGCCATTTTAAAGTGTACGTGAGTGGTGTAAACGTCGCTGAGACAGTTTGGTCCCTATCT                                        | 2603             |
| E. coli                  | 2499               | CTCATGTCGCGCTATACATCCTGGGCTGTAGTCGGTCCCAAGGTTATGGCTGTTCGCCATTTTAAAGTGTACGCGAGCTGGGTTAGAACGTCGCTGAGACAGTTTGGTCCCTATCT                                      | 2617             |
| H. pylori                | 3583               | CTCATGTCGCGCTATACATCCTGGGCTGTAGTCGGTCCCAAGGTTATGGCTGTTCGCCATTTTAAAGCCTACCGGAGCTGGGTTTCAAGACTCCTGAGACAGTTCGCTCCCTATCT                                      | 3701             |

<sup>a</sup> FA1090 alleles 1, 2, 3 and 4 correspond to 23S rRNA sequences of *N. gonorrhoeae* FA1090 (GenBank accession number NC\_002946.2) and include locus tags NGO\_r02 (gene ID: 3370843), NGO\_r05 (gene ID: 3370844), NGO-r08 (gene ID: 3370845) and NGO\_r11 (gene ID: 3370846), respectively. The sequences of all *N. gonorrhoeae* NCCP11945 (GenBank accession number NC\_011035.1) 23S rRNA alleles were identical, however allele 4 (locus tag NGK\_rna23s4, gene ID 6448471) was oriented in a positive DNA strand direction and was used for alignment purposes. *E. coli* sequence corresponds to *Escherichia coli* V00331 (GenBank: V00331.1); and *H. pylori* sequence corresponds to the 23s rRNA portion of *Helicobacter pylori* 23S and 5S ribosomal genes (GenBank U27270.1) (1-4). Sequences for 35410 and 32380 (GenBank: KT954109 and KT954110, respectively) were determined *in silico* from the whole genome sequencing data produced in this study. All four 23S alleles of 35410 had the A2059T mutation and 32380 had the C2611T mutation (*E. coli* numbering) in all four alleles.

<sup>b</sup> Start and end number indicate nucleotide positions from the 5' end for each positively oriented gene.

<sup>c</sup> ^ indicates the position associated with macrolide resistance corresponding to position 2143 of *H. pylori*, 2059 of *E. coli*, and 2045 of *N. gonorrhoeae* NCCP11945.

\* Indicates the position associated with macrolide resistance corresponding to 2695 of *H. pylori*, 2611 of *E. coli*, 2599 of *N. gonorrhoeae* GenBank sequence numbers AF450074 and AF450081; and 2597 of *N. gonorrhoeae* NCCP11945.

## References

1. **Taylor DE, Ge Z, Purych D, Lo T, Hiratsuka K.** 1997. Cloning and sequence analysis of two copies of a 23S rRNA gene from *Helicobacter pylori* and association of clarithromycin resistance with 23S rRNA mutations. *Antimicrob Agents Chemother*; **41**: 2621-8.
2. **Ng L-K, Martin I, Liu G, Bryden L.** 2002. Mutation in 23S rRNA associated with macrolide resistance in *Neisseria gonorrhoeae*. *Antimicrob Agents Chemother*; **46**: 3020-5.
3. **Galarza PG, Abad R, Canigia LF, Buscemi L, Pagano I, Oviedo C, Vázquez JA.** 2010. New mutation in 23S rRNA gene associated with high level of azithromycin resistance in *Neisseria gonorrhoeae*. *Antimicrob Agents Chemother*; **54**: 1652-3. doi:10.1128/AAC.01506-09.
4. **Chisholm SA, Dave J, Ison CA.** 2010. High-level azithromycin resistance occurs in *Neisseria gonorrhoeae* as a result of a single point mutation in the 23S rRNA genes. *Antimicrob Agents Chemother* **54**:3812-3816.
